# Supplementary material for: Person-Generated Health Data in Simulated Rehabilitation Using Kinect for Stroke: Literature Review
Source: JMIR Rehabil Assist Technol. 2018 May 8;5(1):e11. doi: 10.2196/rehab.9123 (PMC5964303; doi:10.2196/rehab.9123)
Supplement: Multimedia Appendix 5 [file rehab_v5i1e11_app5.pdf]

## Types of papers.

This is a Multimedia Appendix to a full manuscript published in the J Med Internet Res.  
For full copyright and citation information see <http://dx.doi.org/10.2196/jmir.9123>.

Table 5. Clinical-focused papers.

| Clinical-focused papers (N=9)      |                                                                                                                                                                                                    |
|------------------------------------|----------------------------------------------------------------------------------------------------------------------------------------------------------------------------------------------------|
| Reference                          | Description                                                                                                                                                                                        |
| Cohort Studies (N=2)               |                                                                                                                                                                                                    |
| [36]                               | Compared the physical and psychological effects on patients who either used a Kinect-based rehabilitation, or a bicycle ergometre training system.                                                 |
| [57]                               | Compared the effects of using Kinect-based training games on stroke patients with varied cerebral hemisphere-affected areas.                                                                       |
| Case Reports (N=2)                 |                                                                                                                                                                                                    |
| [49]                               | Evaluated a developed reaching exercise game for clinical effectiveness with 15 patients in a non-controlled setting.                                                                              |
| [50]                               | Evaluated the clinical effectiveness of an off-the-shelf Kinect-based game for rehabilitation. Changes in the activated brain regions were also observed.                                          |
| Randomised Controlled Trials (N=5) |                                                                                                                                                                                                    |
| [71]                               | Study protocol: will evaluate the feasibility, efficacy and safety of a Kinect-based system.                                                                                                       |
| [72]                               | Study protocol: will assess the impact on patients who will use an interactive system at home, with a traditional home exercise programme.                                                         |
| [37,38]                            | Compared the effects of using Kinect-based games along with usual therapy on patient muscle strength and tone, against patients who only performed traditional therapy.                            |
| [39]                               | Assessed the clinical effectiveness of a tele-motion rehabilitation system by comparing the effects on patients who used the system, against those who performed traditional home-based exercises. |

Table 6. Technical papers.

| Technical papers (N=32)                                                                                                               |                                                                                                                                                                                                                           |
|---------------------------------------------------------------------------------------------------------------------------------------|---------------------------------------------------------------------------------------------------------------------------------------------------------------------------------------------------------------------------|
| Reference                                                                                                                             | Description                                                                                                                                                                                                               |
| Survey (N=1)                                                                                                                          |                                                                                                                                                                                                                           |
| [51]                                                                                                                                  | Used a questionnaire to gather user perceptions, and preferences to design a mode of interaction with a visual object in an augmented reality environment.                                                                |
| Proof of concept (N=5)<br><i>Tested the concept of K-SRS, and using other technologies with Kinect, for stroke rehabilitation.</i>    |                                                                                                                                                                                                                           |
| [48]                                                                                                                                  | Assessed the feasibility of using a gamified, home-based rehabilitation system for stroke patients.                                                                                                                       |
| [40]                                                                                                                                  | Investigated the feasibility of using functional electrical stimulation to upper limb muscles for completion of tasks; and using iterative learning control algorithms to control the FES signals applied to the muscles. |
| [45]                                                                                                                                  | Tested the concept of using body machine interfaces with Kinect.                                                                                                                                                          |
| [41]                                                                                                                                  | Tested a Kinect-based model for assessing individual components of the timed-up and go test, followed by an assessment of the system's reliability.                                                                       |
| [61]                                                                                                                                  | Assessed the feasibility of a system for robot-assisted rehabilitation through gaze tracking, a brain-computer interface, and Kinect.                                                                                     |
| Application Development (N=17)<br><i>Primarily described the process of designing or building a system for stroke rehabilitation.</i> |                                                                                                                                                                                                                           |
| [22,35,43,47,52,56,63,64,65,                                                                                                          | Developed a system to provide movement or posture therapy.<br><i>Additionally: [66] included a monitoring component for falls prevention among the elderly;</i>                                                           |

|                                                                                                                           |                                                                                                                                                                                                                                                                              |
|---------------------------------------------------------------------------------------------------------------------------|------------------------------------------------------------------------------------------------------------------------------------------------------------------------------------------------------------------------------------------------------------------------------|
| [68]                                                                                                                      | [47] provided speech therapy; [43] re-engineered a previously-developed immersive multimedia rehabilitation environment for improved control; and [56] used 'intelligent objects' with sensors to aid in ADL recovery.                                                       |
| [46,55]                                                                                                                   | Developed a system to assess movement capabilities of patients.<br><i>Additionally:</i> [46] provided rehabilitation for motor function.                                                                                                                                     |
| [23]                                                                                                                      | Developed a system to assist patients in improving movement, and predicted their recovery.                                                                                                                                                                                   |
| [53]                                                                                                                      | Developed a hybrid system that incorporated a low cost brain computer interface system called MindWave for brain signal input, with Kinect tracking user movement.                                                                                                           |
| [65]                                                                                                                      | Digitised box-and-blocks test, where a traditional BBT was used but the progress, quantified by the number of blocks moved within a period of time, was tracked by Kinect.                                                                                                   |
| [42]                                                                                                                      | Virtualised BBT, with patients controlling a virtual hand to move virtual blocks.                                                                                                                                                                                            |
| [69]                                                                                                                      | Proposed an exercise game system framework that provides online biofeedback to patients and therapists based on patient movements for safer and better exercise sessions.                                                                                                    |
| Platform Development (N=6)<br><i>Explained how multiple body-tracking technologies could be integrated in one system.</i> |                                                                                                                                                                                                                                                                              |
| [54,70]                                                                                                                   | Developed platforms that made use of multiple consumer body-tracking devices, e.g., Kinect and Nintendo Wii, as input devices.                                                                                                                                               |
| [59]                                                                                                                      | Developed a platform that made use of multiple consumer body-tracking devices, i.e., Kinect, Leap Motion, and Orbotix Sphero to be used simultaneously to track multiple parts of the body.                                                                                  |
| [67]                                                                                                                      | Offered gamified rehabilitation exercises to patients (which therapists can prescribe), monitor their performance, and connect with online health records to share information with clinicians; while wearables send updates for regular monitoring of patients' well-being. |
| [58]                                                                                                                      | Developed a K-SRS, and a cuffless blood pressure device with a chair-based electrocardiogram and photoplethysmograph for monitoring.                                                                                                                                         |
| [60]                                                                                                                      | Developed a smart glove in-house to work with Kinect and track fine motor finger movement.                                                                                                                                                                                   |
| Assessment (N=3)<br><i>Conducted technical assessments of Kinect as a body-tracking device for stroke rehabilitation.</i> |                                                                                                                                                                                                                                                                              |
| [44]                                                                                                                      | Assessed its tracking and evaluation of components of spatiotemporal gait movements.                                                                                                                                                                                         |
| [30]                                                                                                                      | Assessed Kinect's test-retest reliability in finding movement indices.                                                                                                                                                                                                       |
| [62]                                                                                                                      | Compared the precision of Kinect against another device, Shimmer, in tracking exercise movements.                                                                                                                                                                            |
