# Supplementary material for: Person-Generated Health Data in Simulated Rehabilitation Using Kinect for Stroke: Literature Review
Source: PubMed Central journal article supplement (PMC5964303; doi:10.2196/rehab.9123), 2018-05-08
Supplement: rehab_v5i1e11_app4.pdf [file rehab_v5i1e11_app4.pdf]

Analysis of PGHD, home use, and effectiveness in existing systematic reviews of Kinect-based stroke rehabilitation systems.

This is a Multimedia Appendix to a full manuscript published in the J Med Internet Res. For full copyright and citation information see <http://dx.doi.org/10.2196/jmir.9123>.

Table 4. Existing systematic reviews vis-à-vis themes of interest.

| Themes                                                     | Webster and Celik (2014) | Hondori and Khademi (2014) | Da Gama, Fallavollita, Teichrieb and Navab (2015) |
|------------------------------------------------------------|--------------------------|----------------------------|---------------------------------------------------|
| Did the review analyse PGHD utilisation in the literature? | No                       | No                         | No                                                |
| Did the review analyse home use in the literature?         | No                       | No                         | No                                                |
| Did the review analyse effectiveness in the literature?    | Yes                      | Yes                        | Yes                                               |
